# Supplementary material for: Oncogenic Kras is required for both the initiation and maintenance of pancreatic cancer in mice
Source: JCI journal article supplement (doi:10.1172/jci59227), 2012-01-09
Supplement: sd1 [file 1]

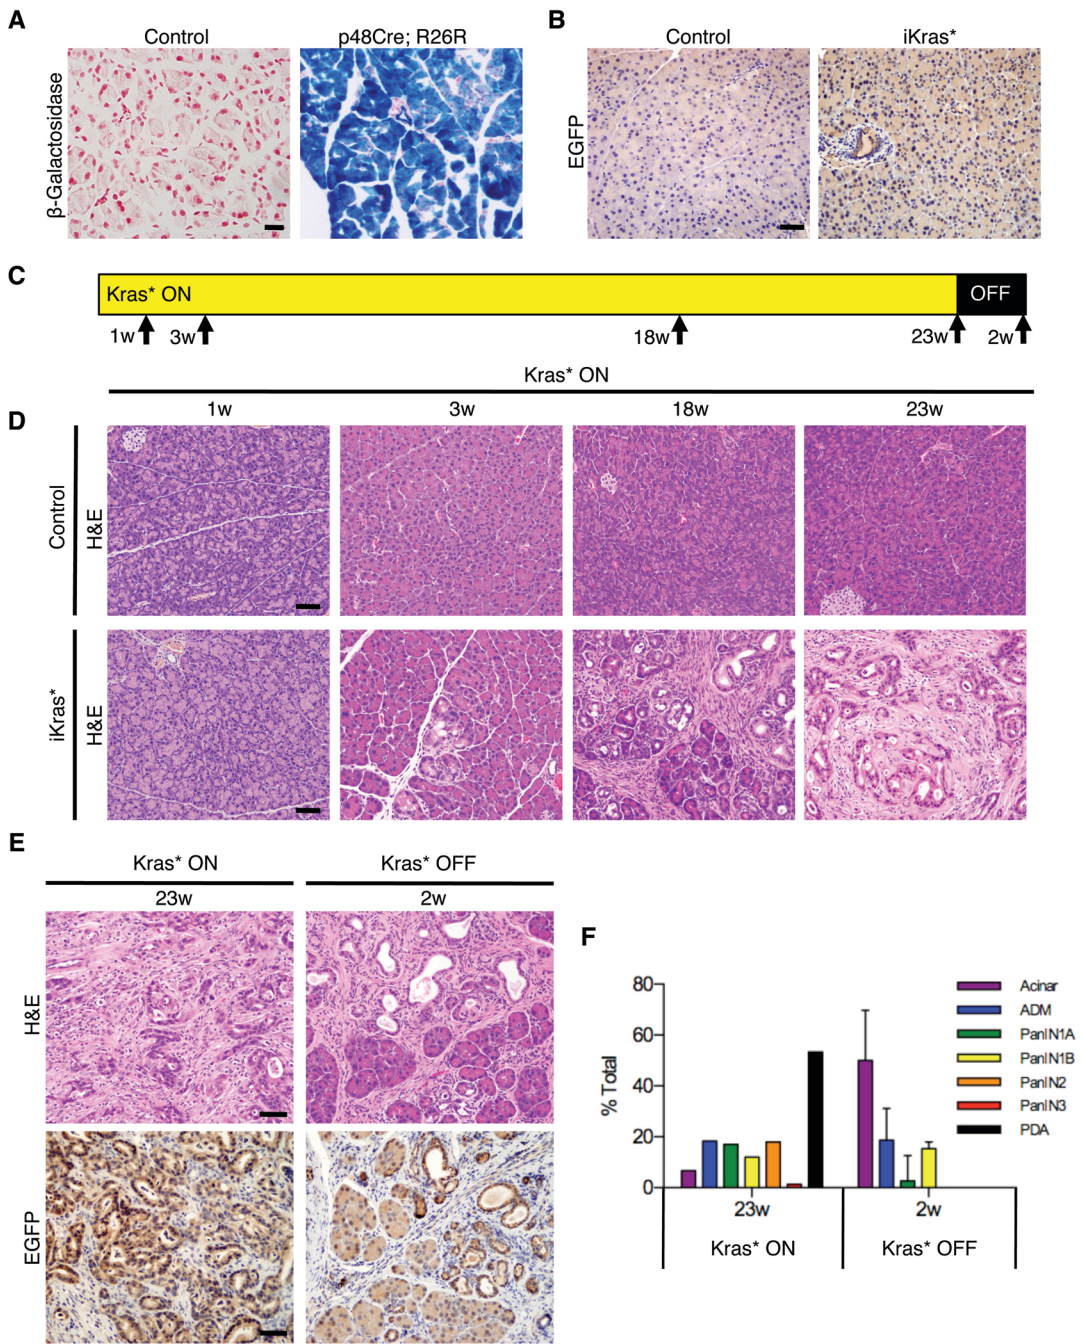

**Supplemental Figure 1**

**Analysis of the induction of Kras\* expression.** (A) Lineage tracing of p48Cre expression, shown by Beta-galactosidase staining shows exclusive expression in the epithelial compartment of the pancreas. Scale bar 20um. (B) *rtTa-ires-EGFP* expression is specific to pancreatic epithelium, ducts and acini, shown by EGFP immunohistochemistry. Scale bar 50um. (C) Experimental design: Kras\* expression was maintained ON and tissue was harvested at the indicated timepoints. Following Kras\* activation for 23 weeks, Kras\* was turned OFF for 2 weeks. (D) Histology of the pancreas of both control and iKras\* animals at the indicated timepoints. Scale bar 50um. (E) Analysis of tissue histology upon Kras\* inactivation (top row) and EGFP immunohistochemistry (bottom row) at the indicated timepoints. Scale bar 50um. (F) Quantification of pancreas histology. Data represent mean ± SEM



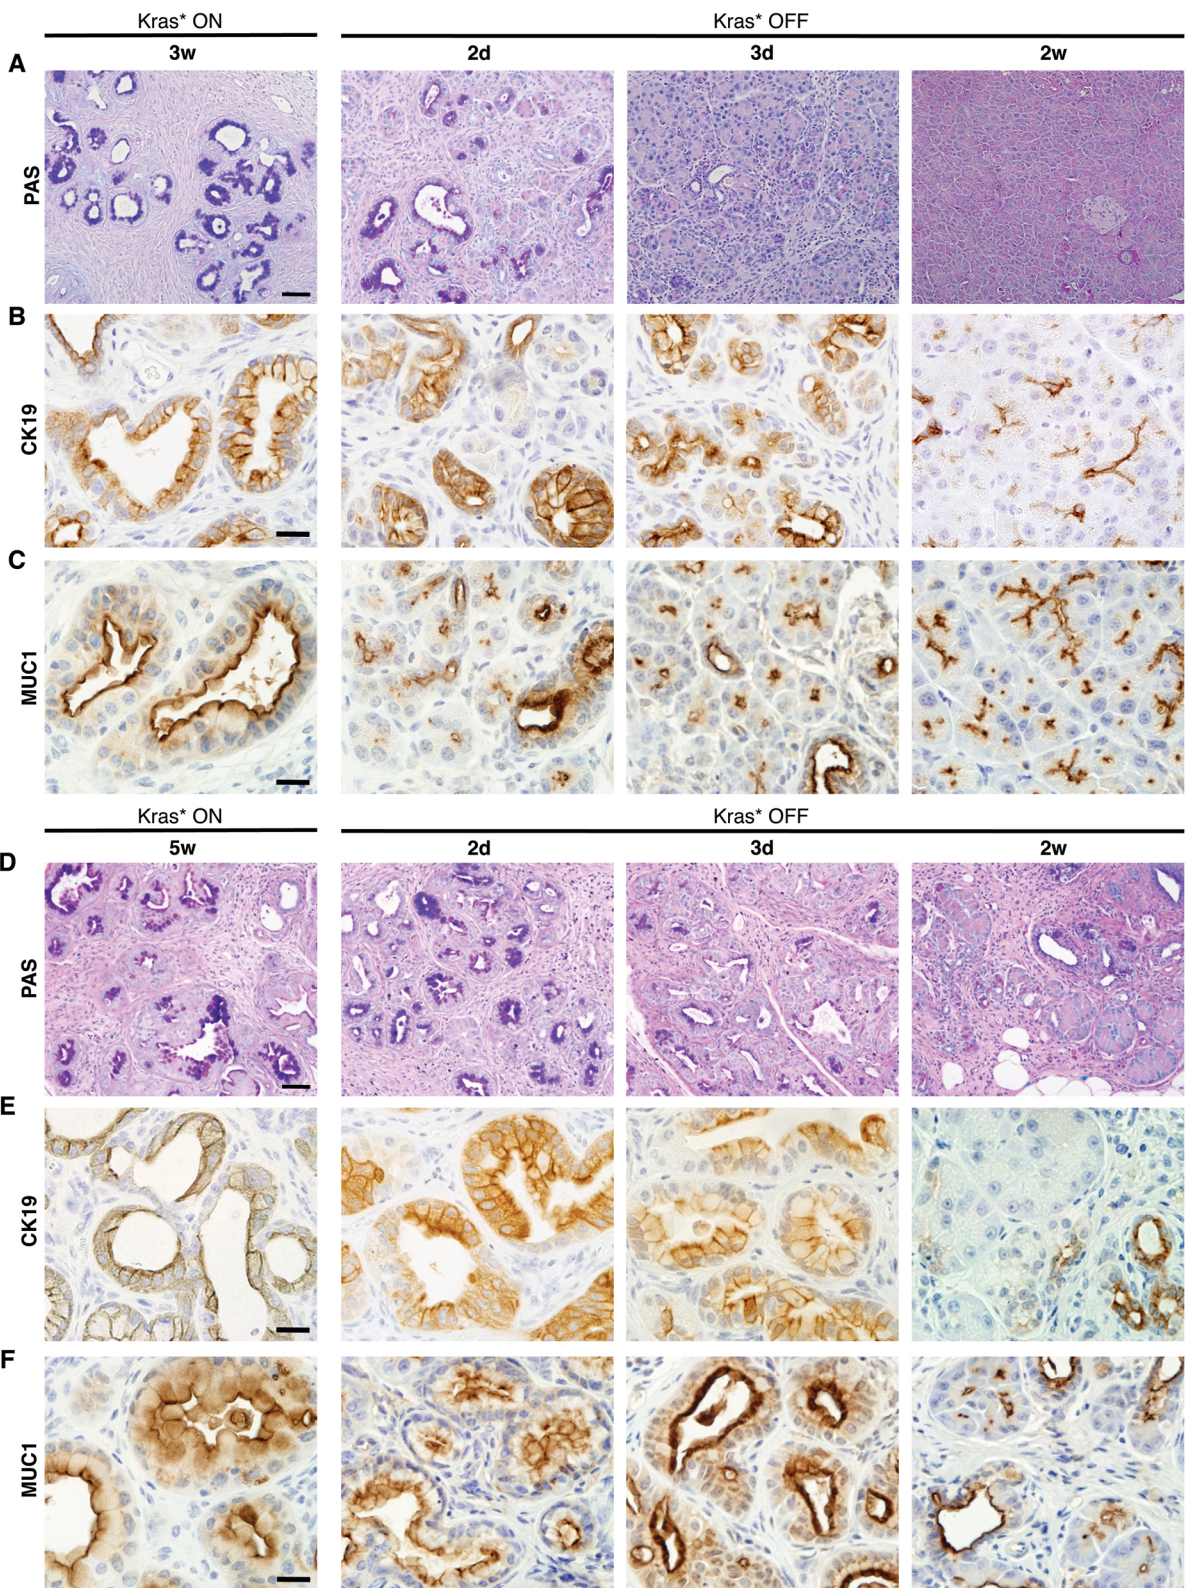

**Supplemental Figure 3**

**Regression of early and established PanINs.** Kras\* expression was maintained ON for either 3 or 5 weeks following pancreatitis, then turned OFF for 2 days, 3 days, and 2 weeks. n=3-5 mice/timepoint (**A, D**) Reduction in mucin positive cells shown by Periodic Acid Schiff (PAS) staining of the pancreata at the indicated timepoints. Scale bars 20µm. Regression of ductal-like cells as indicated by (**B, E**) CK19 and (**C, F**) MUC1 immunohistochemistry at the indicated timepoints. Scale bars 20µm.

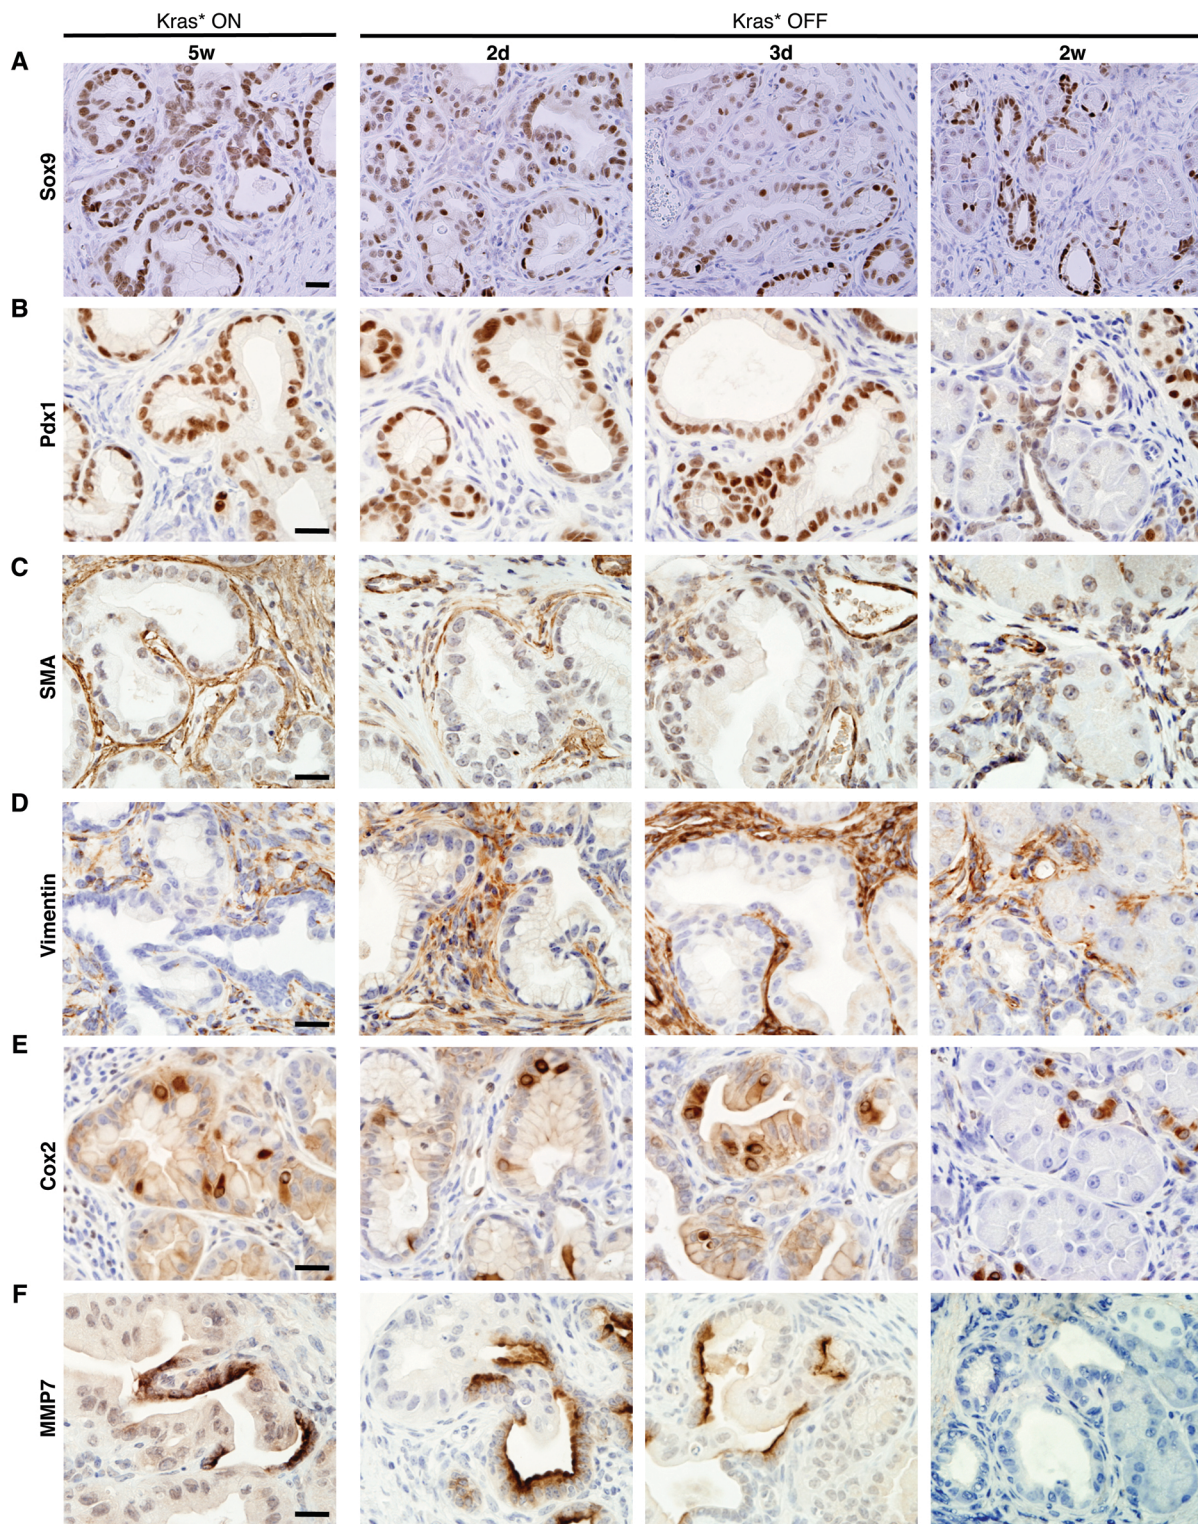

**Supplemental Figure 4**

**Established PanINs have a delayed recovery process.** Kras\* expression was maintained ON for 5 weeks following pancreatitis, then turned OFF for 2 days, 3 days, and 2 weeks. n=3-5 mice/timepoint. **(A-F)** Immunohistochemistry for **(A)** Sox-9 and **(B)** Pdx1, both progenitor markers, **(C)** alpha-Smooth muscle actin and **(D)** Vimentin, markers of reactive fibroblasts, and **(E)** Cox2 and **(F)** MMP7. Scale bars 20um.

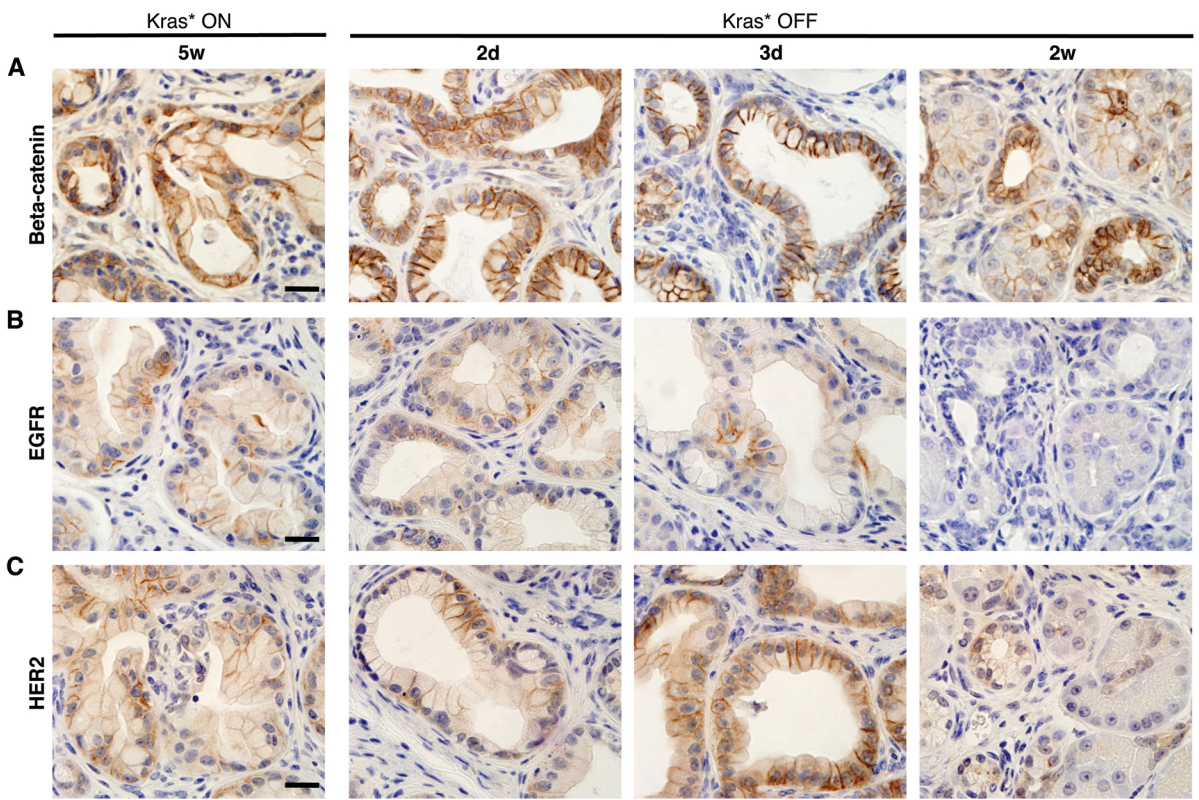

**Supplemental Figure 5**

**Regression of pathway components upon the inactivation of Kras\*.** Kras\* expression was maintained ON for 5 weeks following pancreatitis, then turned OFF for 2 days, 3 days, and 2 weeks. n=3-5 mice/timepoint. Immunohistochemistry for (A) Beta-catenin and the EGFR family members (B) EGFR, and (C) HER2. Scale bars 20um.

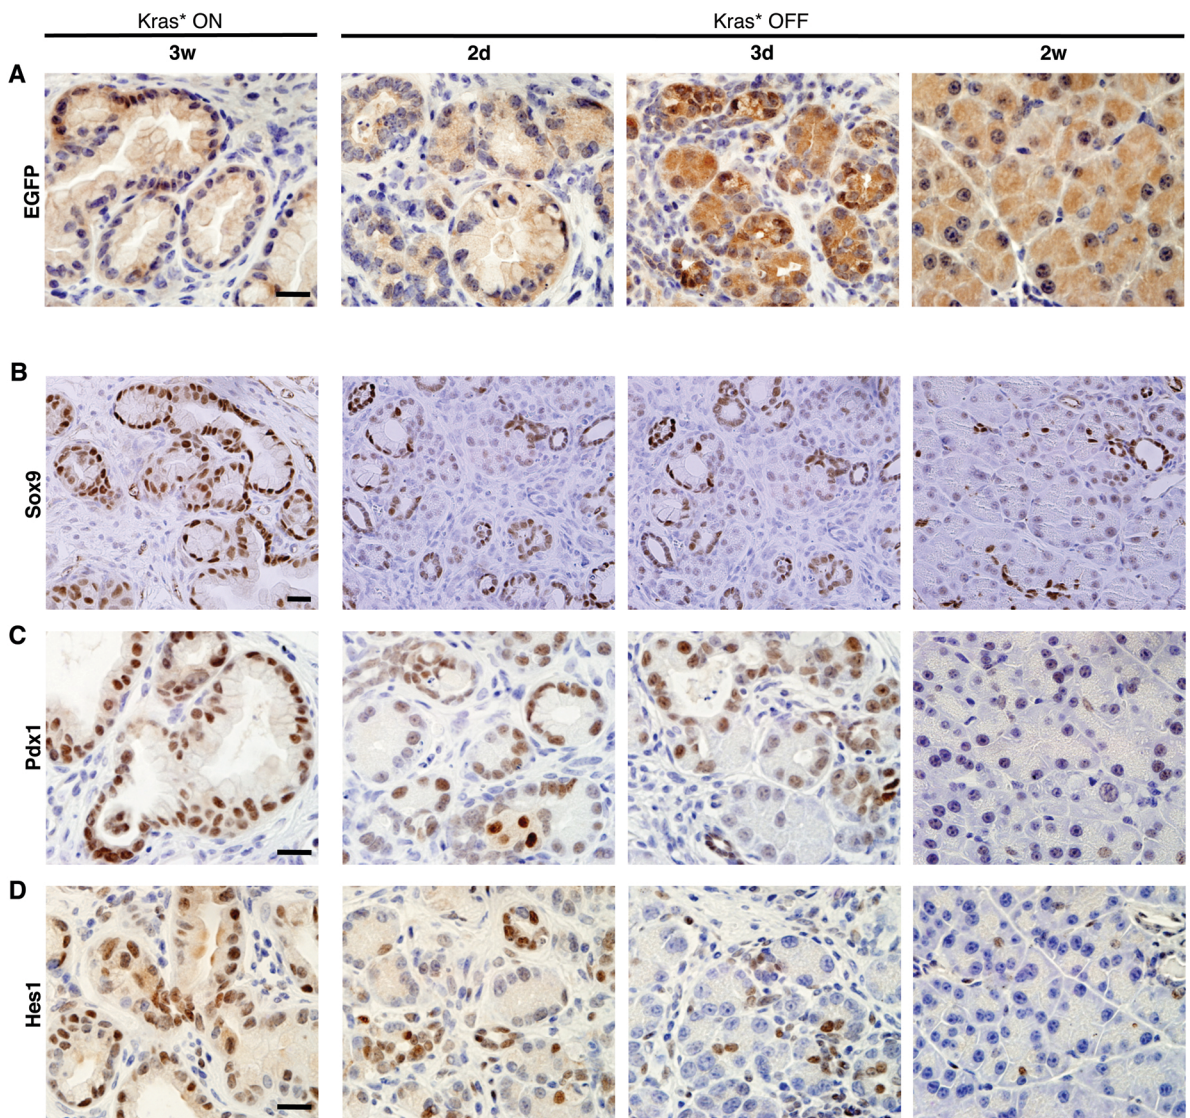

**Supplemental Figure 6**

**Analysis of the mechanism of tissue recover from early PanIN lesions.** Kras\* expression was maintained ON for 3 weeks following pancreatitis, then turned OFF for 2 days, 3 days, and 2 weeks. n=3-5 mice/timepoint. **(A)** Lineage tracing, shown by EGFP immunohistochemistry, shows cells that make up the recovered tissue arose from those having previously expressed oncogenic Kras\*. Scale bar 20um. Analysis of pancreatic progenitor markers during tissue recovery **(B)** Sox9, **(C)** Pdx1, and **(D)** Hes1. Scale bars 20um.

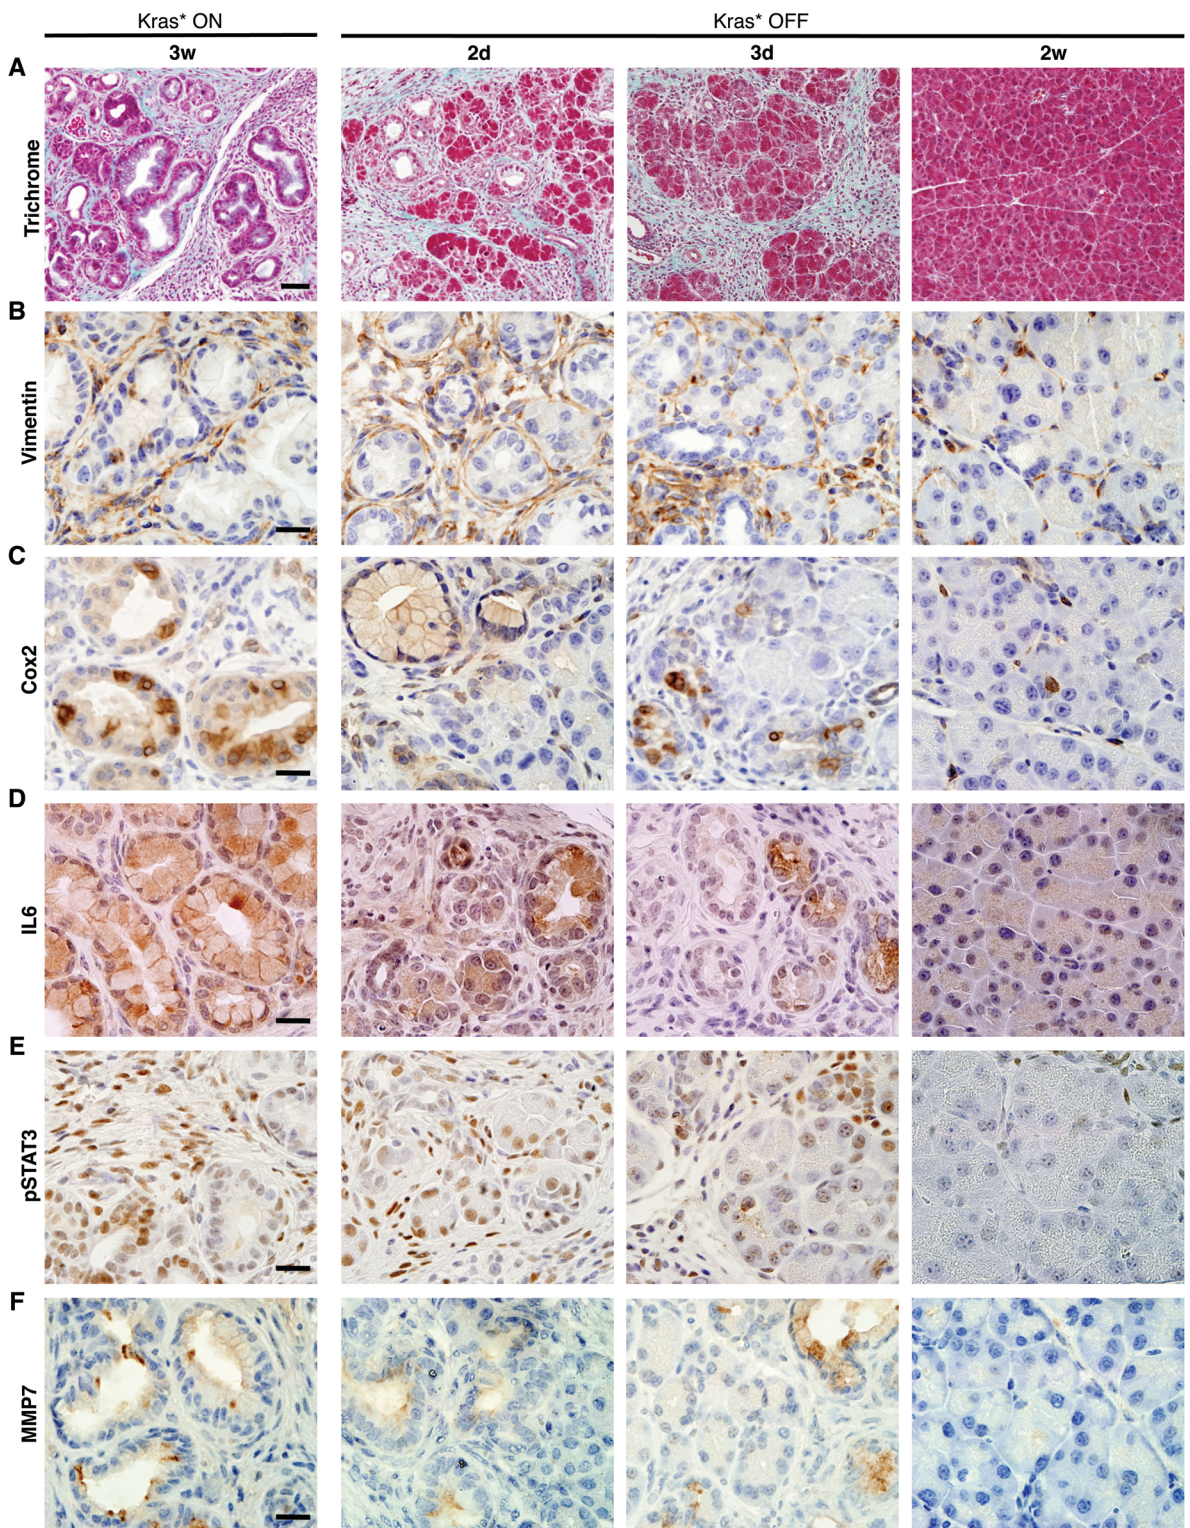

### Supplemental Figure 7

**Oncogenic Kras\* regulates the microenvironment.** Kras\* expression was maintained ON for 3 weeks following pancreatitis, then turned OFF for 2 days, 3 days, and 2 weeks. n=3-5 mice/timepoint. **(A)** Gomori's Trichrome staining for collagen (green) shows a reduction in fibrotic stroma upon the inactivation of Kras\*. Scale bar 50um. Immunohistochemistry of fibrotic marker **(B)** Vimentin, inflammatory markers **(C)** Cox2, **(D)** IL6, and **(E)** phospho-STAT3, and the metalloproteinase **(F)** MMP7. Scale bars 20um.

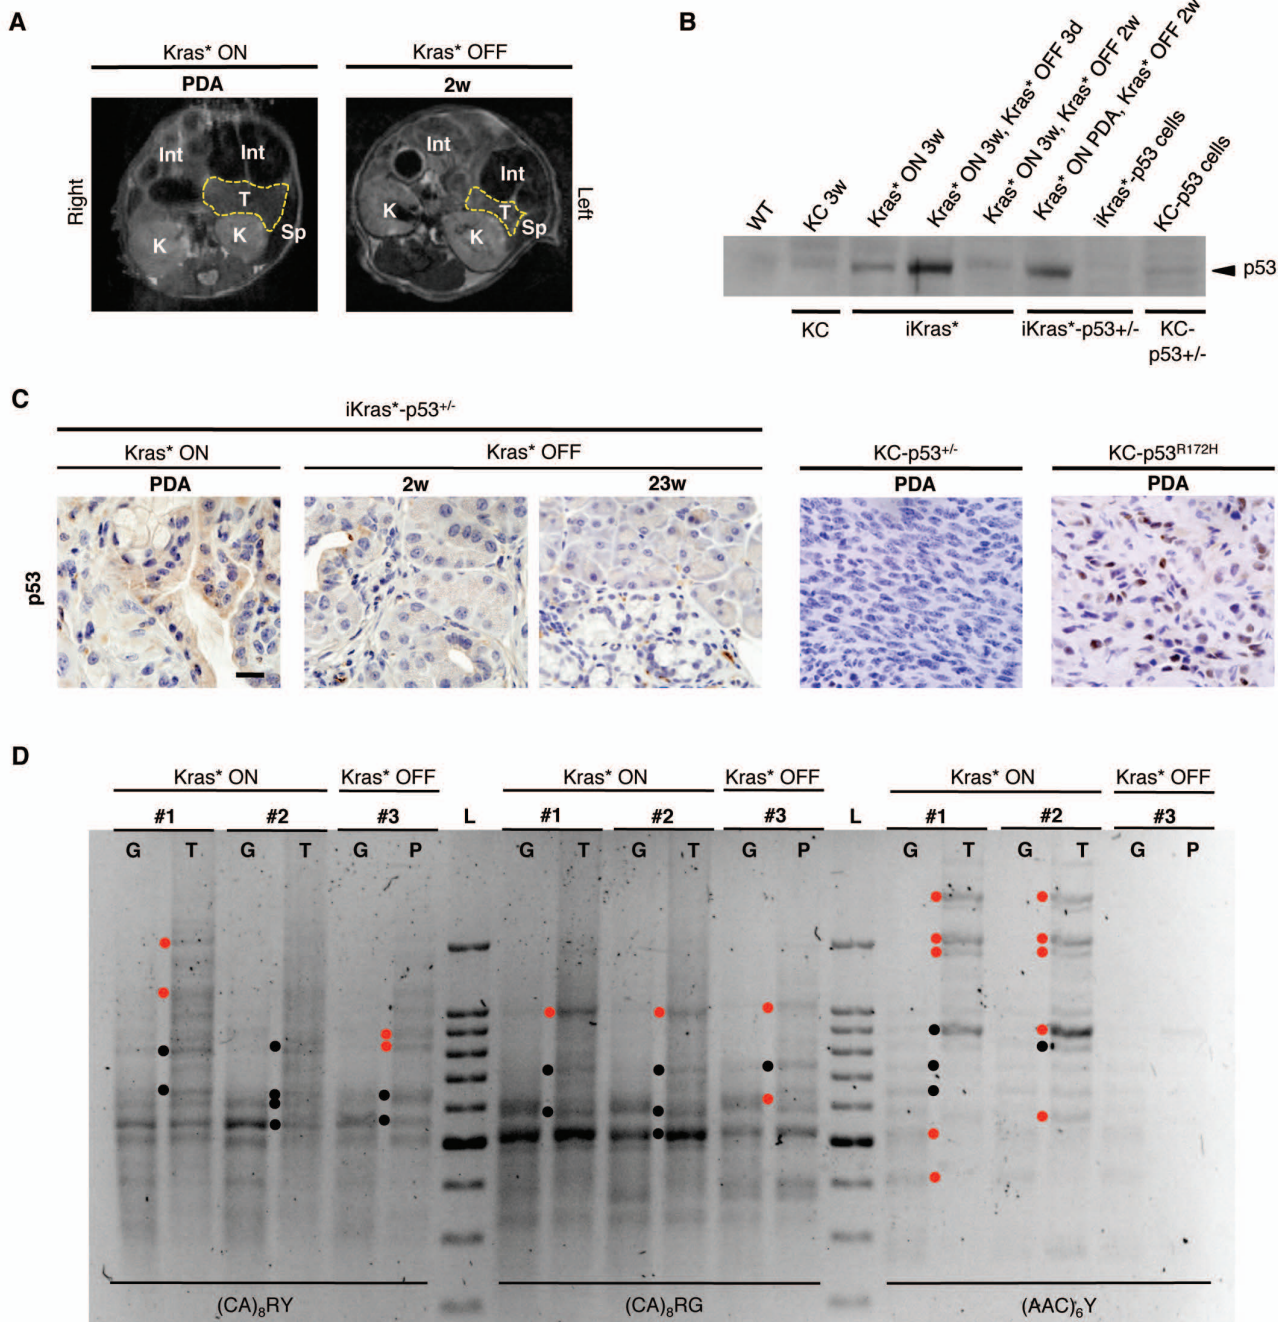

### Supplemental Figure 8

**Characterization of iKras\*<sup>-</sup>p53<sup>+/-</sup> tumors.** Kras\* expression was maintained ON until the mice developed frank adenocarcinoma, then inactivated for 2 or 23 weeks. **(A)** In vivo imaging of one iKras\*<sup>-</sup>p53<sup>+/-</sup> mouse using magnetic resonance. T: tumor (outlined in yellow), Sp: spleen, K: kidney, Int: intestine. Note the tumor in the tail of the pancreas in the image on the left, and regression after two weeks off doxy. **(B)** Western blot for p53 expression in the indicated samples. **(C)** Immunohistochemistry for p53 in iKras\*<sup>-</sup>p53<sup>+/-</sup> tumors, and at two time-points following Kras\* inactivation, as well as in KC-p53<sup>+/-</sup> and KC-p53<sup>R172H</sup> tumors. Note the lack of expression in iKras\*<sup>-</sup>p53<sup>+/-</sup> and KC-p53<sup>+/-</sup> tissues, and accumulation of nuclear p53 in p53<sup>R172H</sup> tissues that express a dominant negative p53 allele. Scale bars 20um. **(D)** Representative example of DNA fingerprints obtained with 3 different sets of primers. DNA was extracted from PDA tissue, T, from two different animals, and matched genomic, G, and from pancreatic tissue, P, of a third animal following Kras\* inactivation. Red dots represent absence of bands in either the tumor or corresponding genomic, black dots represent changes in intensity. L: 100bp ladder.



## Supplementary Tables

**Supplementary Table 1: Antibodies**

| Antibody                  | Supplier                          | Catalog Number | IHC dilution | IF Dilution | WB dilution |
|---------------------------|-----------------------------------|----------------|--------------|-------------|-------------|
| Amylase                   | Sigma-Aldrich                     | A8273          | -            | 1:100       | -           |
| Beta-Catenin              | Cell Signaling                    | 9587           | 1:100        | -           | -           |
| Beta-galactosidase (LacZ) | Abcam                             | Ab9361         | -            | 1:200       | -           |
| CK19 (Tromalll)           | Iowa Developmental Hybridoma Bank | -              | 1:100        | 1:100       | -           |
| Claudin-18                | Invitrogen                        | 700178         | 1:150        | -           | -           |
| Cleaved Caspase-3         | Cell Signaling                    | 9661           | 1:100        | -           | -           |
| Cox 2                     | Lab Vision                        | RM9121S0       | 1:200        | -           | -           |
| E-Cadherin                | Cell Signaling                    | 4065           | -            | -           | 1:1000      |
| EGFP                      | Invitrogen                        | A11122         | 1:100        | -           | -           |
| EGFR                      | Cell Signaling                    | 4267           | 1:50         | -           | -           |
| ERK1/2 (p44/42)           | Cell Signaling                    | 4695           | -            | -           | 1:1000      |
| Gamma-H2AX                | Millipore                         | 05636          | 1:400        | -           | -           |
| HER2/ErbB2                | Cell Signaling                    | 2165           | 1:400        | -           | -           |
| Hes1                      | Ben Stanger (UPenn)               | -              | 1:1500       | -           | -           |
| IL6                       | Abcam                             | Ab6672         | 1:500        | -           | -           |
| Ki67                      | Vector Laboratories               | VP-RM04        | 1:100        | 1:100       | -           |
| MMP7                      | R&D Systems                       | AF2967         | 1:100        | -           | -           |
| MUC1                      | Thermo Scientific                 | HM1630-P       | 1:100        | -           | -           |
| P53                       | Abcam                             | Ab26           | 1:200        | -           | -           |
| P53                       | Cell Signaling                    | 2524           | -            | -           | 1:1000      |
| Pdx1                      | Chris Wright (Vanderbilt)         | -              | 1:5000       | -           | -           |
| p-ERK1/2 (phospho-p44/42) | Cell Signaling                    | 4370           | 1:100        | -           | 1:1000      |
| Shh                       | R&D Systems                       | AF445          | 1:100        | -           | -           |
| Alpha-Smooth Muscle Actin | Sigma                             | A2547          | 1:1000       | 1:1000      | -           |
| Sox9                      | Millipore                         | AB5535         | 1:500        | -           | -           |
| p-STAT3                   | Cell Signaling                    | 9145           | 1:100        | -           | -           |
| Vimentin                  | Cell Signaling                    | 5741           | 1:100        | -           | -           |

**Supplementary Table 2: Primer sequences for quantitative RT-PCR**

| Gene            | Primer Name     | Primer Sequence              | Reference |
|-----------------|-----------------|------------------------------|-----------|
| Transgenic Kras | qTRE-Kras-F     | CAAGGACAAGGTGTACAGTTATGTGACT | (2)       |
|                 | qTRE-Kras-mp1-R | GCCTGCGACGGCGGCATCTGC        |           |
| Shh             | qShh-F          | CAAAGCTCACATCCACTGTTCTG      | (1)       |
|                 | qShh-R          | GAAACAGCCGCCGGATTT           |           |
| Ptch1           | qPtch1-F        | TTGTGGAAGCCACAGAAAACC        | (1)       |
|                 | qPtch1-R        | TGTCTGGAGTCCGGATGGA          |           |
| Gli1            | qGli1-F         | GCAGTGGGTAACATGAGTGTCT       | (3)       |
|                 | qGli1-R         | AGGCACTAGAGTTGAGGAATTTGT     |           |
| Gli2            | qGli2-F         | GTGCACAGCAGCCCCACACTCTC      |           |
|                 | qGli2-R         | GGTAATAGTCTGAAGGGTTGGTGCCTGG |           |

**Supplemental References**

1. Pasca di Magliano, M., Sekine, S., Ermilov, A., Ferris, J., Dlugosz, A.A., and Hebrok, M. 2006. Hedgehog/Ras interactions regulate early stages of pancreatic cancer. *Genes Dev* 20:3161-3173.
2. Fisher, G.H., Wellen, S.L., Klimstra, D., Lenczowski, J.M., Tichelaar, J.W., Lizak, M.J., Whitsett, J.A., Koretsky, A., and Varmus, H.E. 2001. Induction and apoptotic regression of lung adenocarcinomas by regulation of a K-Ras transgene in the presence and absence of tumor suppressor genes. *Genes Dev* 15:3249-3262.
3. Yauch, R.L., Gould, S.E., Scales, S.J., Tang, T., Tian, H., Ahn, C.P., Marshall, D., Fu, L., Januario, T., Kallop, D., et al. 2008. A paracrine requirement for hedgehog signalling in cancer. *Nature* 455:406-410.
